# Supplementary material
Source: publisher figshare collection journal article supplement (https://adisjournals.figshare.com/ndownloader/files/35916005)
Supplement: Supplementary file 1 [file 35916005]

# A prospective, real-world, French post-reimbursement study (LOUVRE 2) confirms efficacy of the dexamethasone 0.7 mg intravitreal implant (DEX) in treating the most vision-threatening form of uveitis

Adis

OPEN ACCESS

PEER-REVIEWED FEATURE

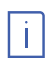

## BACKGROUND

Posterior uveitis is the most vision-threatening and challenging form of uveitis to treat, in part due to the target tissue location (back of the eye) and lack of effective topical treatment delivery

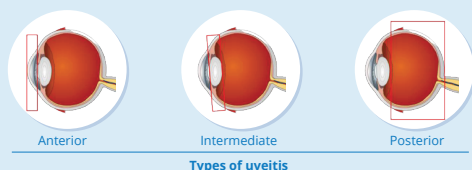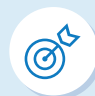

## OBJECTIVE

To evaluate real-life

- efficacy,
- safety, and
- treatment patterns

with DEX in a population of adults with posterior segment inflammation due to non-infectious uveitis that was treatment-naïve or not

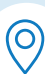

## STUDY DESIGN

Prospective, multicenter, non-comparative, post-reimbursement, real-world study

Patients who received DEX treatment on day 0 were followed

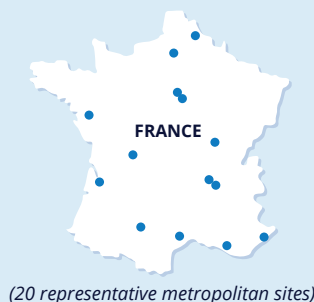

(20 representative metropolitan sites)

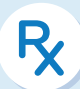

## TREATMENT

Treatment selection decisions (including type and frequency) were made at the investigators' discretion

In cases of bilateral treatment, the eye with the worse best-corrected visual acuity (BCVA) and/or vitreous haze score at enrollment was the study eye

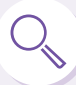

## FINDINGS

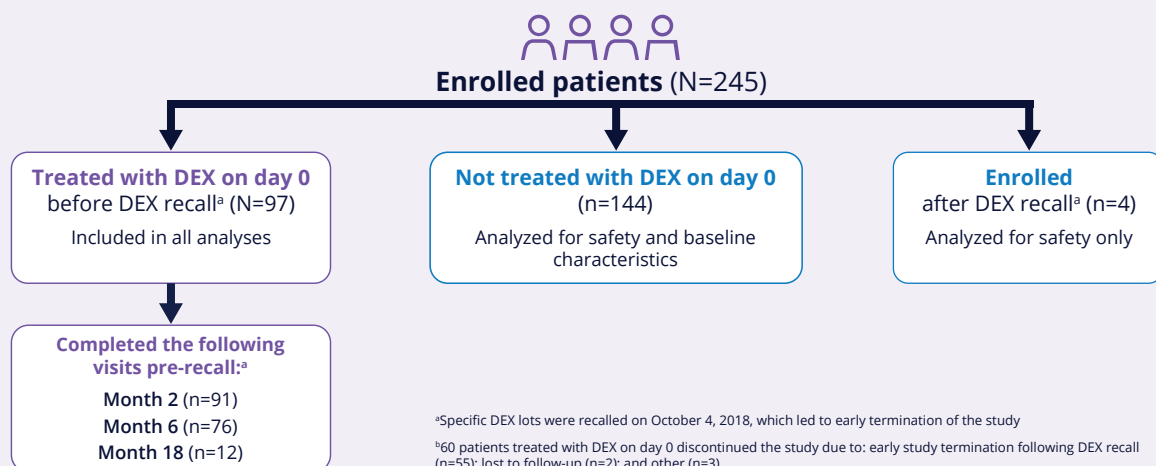

Compared with baseline, statistically significant proportions of patients treated with DEX on day 0 gained  $\geq 15$  letters in BCVA at months 2 and 6

Percentage of Patients With a  $\geq 15$ -Letter BCVA Gain

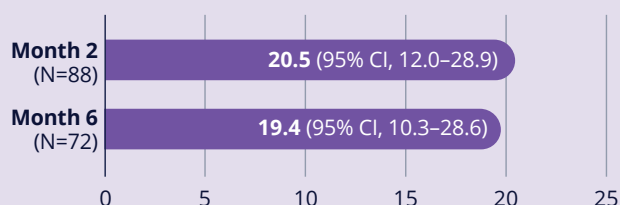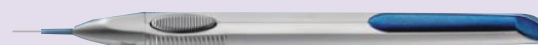

Mean follow-up:  
14.9 months

Mean injection interval:  
5.1 months

Mean injection number:  
1.0

Statistically significant changes in BCVA and CRT from baseline were observed at months 2 and 6

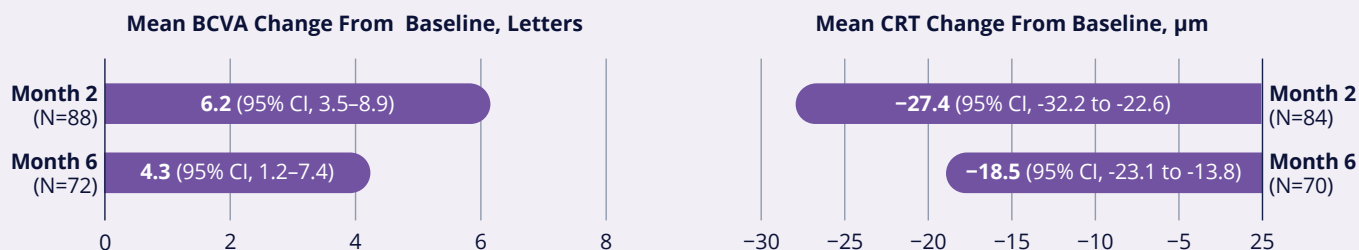

Among patients treated with DEX on day 0, 84 AEs were reported during follow-up; 3 patients discontinued the study due to AEs

#### Potentially DEX related

**32**  
(38.1%)

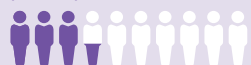

#### Not DEX related

**52**  
(61.9%)

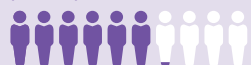

#### Not serious

**80**  
(95.2%)

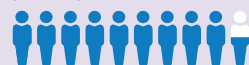

#### Serious

**4**  
(4.8%)

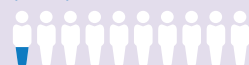

AEs reported in the study (probably/possibly due to the injection procedure or implant, or with uncertain causality)

| Adverse events, n                             |                 |
|-----------------------------------------------|-----------------|
| Total                                         | 32 <sup>a</sup> |
| Ocular conditions                             | 27              |
| Ocular hypertension                           | 20              |
| Conjunctive hemorrhage                        | 3               |
| Vitreous hemorrhage                           | 2               |
| Cataract                                      | 1               |
| Macular fibrosis                              | 1               |
| Medical and surgical procedures               | 4               |
| Cataract surgery                              | 4               |
| General and administrative site complications | 1               |
| Pain at the injection site                    | 1               |

<sup>a</sup>All occurred in patients treated with DEX on day 0

There were statistically significant differences in baseline characteristics between patients treated with DEX on day 0 and those not treated with DEX on day 0



| Baseline Characteristics                                     | Treated with DEX on day 0 | Not treated with DEX on day 0 |
|--------------------------------------------------------------|---------------------------|-------------------------------|
| Mean CRT, $\mu$ m (95% CI)                                   | 424.8 (397.2, 452.3)      | 333.6 (313.6, 353.6)          |
| Macular edema present, % (95% CI)                            | 70.2 (61.0, 79.5)         | 44.0 (35.8, 52.2)             |
| History of cataract, % (95% CI) (surgically operated or not) | 76.3 (67.8, 84.8)         | 56.3 (48.1, 64.4)             |
| Presence of ophthalmic comorbidities, % (95% CI)             | 88.7 (82.3, 95.0)         | 70.8 (63.4, 78.3)             |
| Mean age, y (95% CI)                                         | 60.6 (57.7, 63.4)         | 52.7 (49.9, 55.6)             |
| DEX-naïve, % (95% CI)                                        | 25.3 (16.5, 34.0)         | 58.5 (50.3, 66.6)             |
| Prior DEX treatment, % (95% CI)                              | 54.7 (44.7, 64.7)         | 21.8 (15.0, 28.6)             |

## CONCLUSIONS

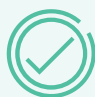

In French clinical settings, DEX improved functional and anatomic outcomes with acceptable safety through month 6 in patients with inflammation of the posterior segment due to non-infectious uveitis (including those previously treated with DEX) for whom treatment options remain limited

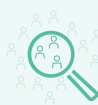

The sample size was smaller than planned due to the product recall/study termination and difficulty in recruiting patients with this disease of low prevalence/incidence

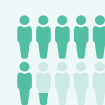

**63.9%** of patients treated with DEX received concomitant treatment for uveitis; the observed results could thus be due to combined treatments, as opposed to DEX alone
